# Supplementary material
Source: PubMed Central journal article supplement (PMC8756539)
Supplement: mmc1.pdf [file mmc1.pdf]

**HGGA, Volume 2**

**Supplemental information**

***PTPN4* germline variants result in aberrant  
neurodevelopment and growth**

**Joanna J. Chmielewska, Deepika Burkardt, Jorge Luis Granadillo, Rachel Slaugh, Shamile Morgan, Joshua Rotenberg, Boris Keren, Cyril Mignot, Luis Escobar, Peter Turnpenny, Melissa Zuteck, Laurie H. Seaver, Rafal Ploski, Magdalena Dziembowska, Anthony Wynshaw-Boris, and Abidemi Adegbola**

**A**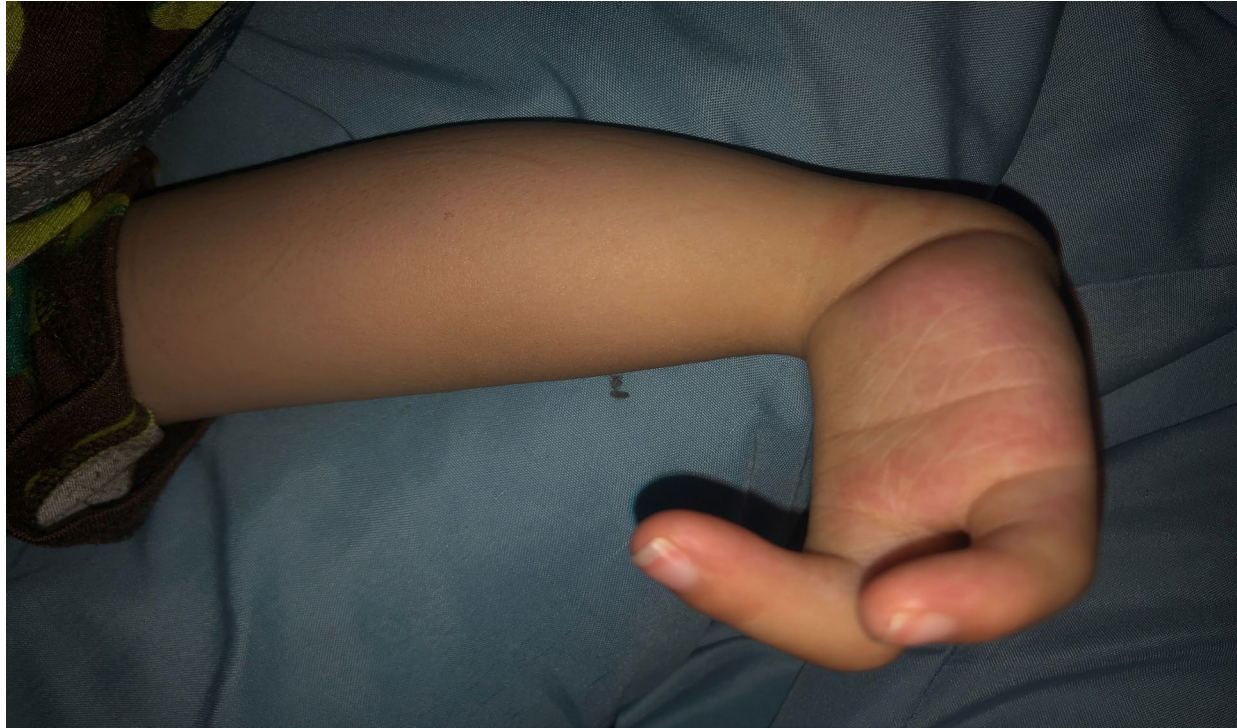**B**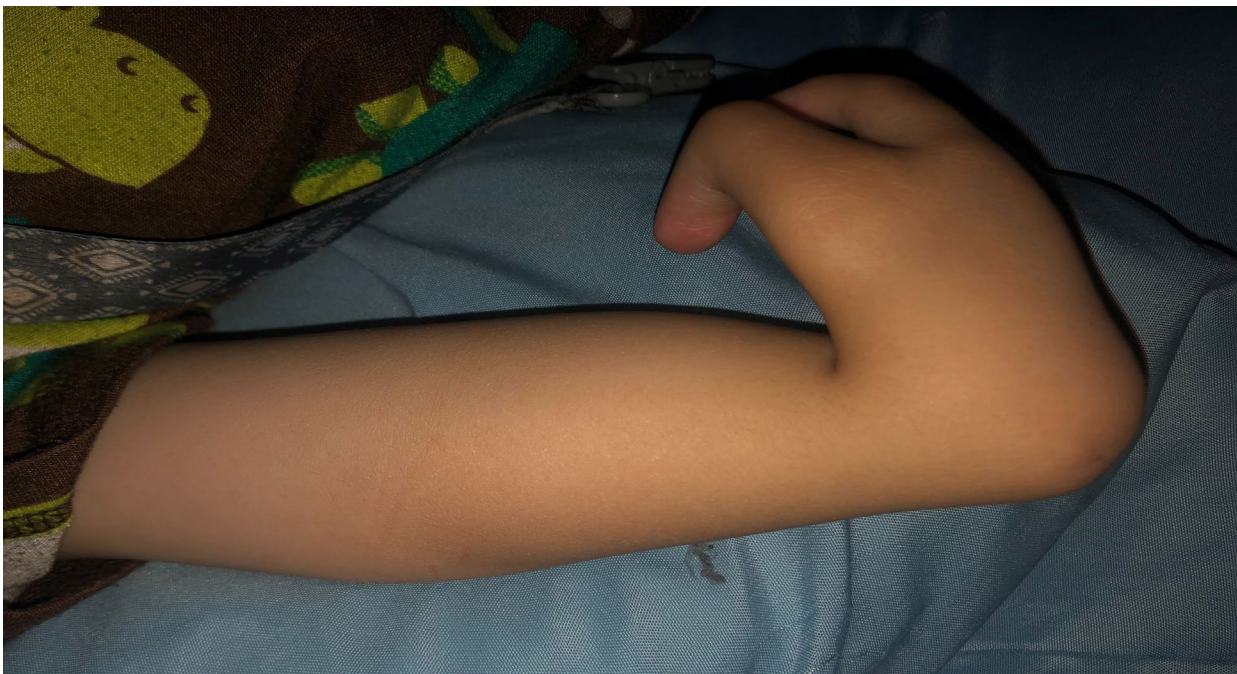**Figure S1****C**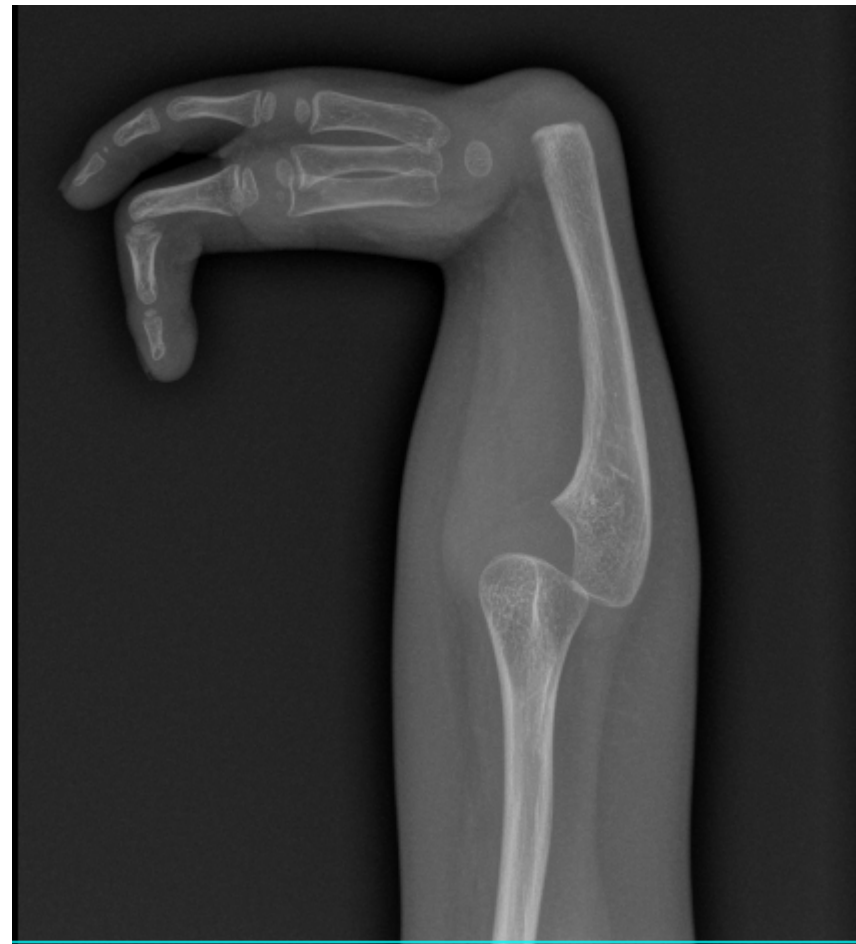

## **SUPPLEMENTAL FIGURE TITLE AND LEGEND**

### **Figure S1. Unilateral radial deficiency with oligodactyly in Subject 3**

(A) and (B) Two views of unilateral right oligodactyly with two digits present. (C)  
Digital X-Ray of right upper extremity showing radial deficiency and oligodactyly.
